# Supplementary material for: Construction of chemical self-charging zinc ion batteries based on defect coupled nitrogen modulation of zinc manganite vertical graphene arrays
Source: Royal Society of Chemistry journal article supplement (doi:10.1039/d1ma00727k), 2021-01-01
Supplement: d1ma00727k1.pdf [file d1ma00727k1.pdf]

## Supporting Information

### Construction of Chemically Self-Charging Aqueous Zinc Ion Batteries Based on Defect Coupled Nitrogen modulation of Zinc Manganite Vertical Graphene Arrays

Wenda Qiu,<sup>‡\*ab</sup> Zhenchao Lin,<sup>‡a</sup> Hongbing Xiao,<sup>a</sup> Guoming Zhang,<sup>a</sup> Hong Gao,<sup>a</sup> Huajie Feng<sup>\*c</sup> and Xihong Lu<sup>b</sup>

<sup>a</sup> Guangdong Industry Polytechnic, 152 Xingang West Road, Guangzhou 510300, China.

<sup>b</sup> MOE of the Key Laboratory of Bioinorganic and Synthetic Chemistry, KLGHEI of Environment and Energy Chemistry, School of Chemistry, Sun Yat-Sen University, 135 Xingang West Road, Guangzhou 510275, China.

<sup>c</sup> Key Laboratory of Electrochemical Energy Storage and Energy Conversion of Hainan Province, School of Chemistry and Chemical Engineering, Hainan Normal University, Haikou 571158, China.

\*Corresponding Author. E-mail: [qiuwd3@mail3.sysu.edu.cn](mailto:qiuwd3@mail3.sysu.edu.cn) (W. Qiu); [Fenghuajiehk@163.com](mailto:Fenghuajiehk@163.com) (H. Feng).

<sup>‡</sup>Wenda Qiu and Zhenchao Lin contributed equally to this work.

#### Calculations:

The areal cell capacitances ( $C_{cell-a}$ ) were calculated from the discharge curve using the following equations:

$$C_{cell-a} = \frac{\int_0^{\Delta t} I \times dt}{S}$$

(1)

where  $I$  (mA) is the applied discharging current,  $\Delta t$  (h) is the discharging time and  $S$  (cm<sup>2</sup>) is the area of cell (0.5 cm<sup>2</sup>).

Specific capacities ( $C_{cell-s}$ ) of the cell were estimated from the discharge curve using the following equations:

$$C_{cell-s} = \frac{\int_0^{\Delta t} I \times dt}{m}$$

(2)

where  $C_{cell-s}$  (mA h g<sup>-1</sup>) is the specific capacity of the H-ZMO NTAs//Zn battery,  $I$  (mA) is the applied discharging current,  $\Delta t$  (h) is the discharging time and  $m$  (g) is the mass of the active material of H-ZMO NTAs (3.2 mg cm<sup>-2</sup>).

Specific energy density  $E$  and specific power density  $P$  of the cell were obtained from the following equations:

$$E = C_{cell-s} * \Delta V \quad (3)$$

$$P = \frac{C_{cell-s} * \Delta V}{1000 * \Delta t}$$

(4)

where  $E$  (Wh kg<sup>-1</sup>) is the energy density,  $C_{cell-s}$  is the specific capacity obtained from Equation (2) and  $\Delta V$  (V) is the voltage window.  $P$  (kW kg<sup>-1</sup>) is the specific power density and  $\Delta t$  (h) is the discharging time.

The chemical diffusion coefficient of  $\text{Zn}^{2+}$  can be calculated based on the following equation:

$$D_{GITT} = \frac{4}{\pi\tau} \left( \frac{n_m V_m}{S} \right)^2 \left( \frac{\Delta E_s}{\Delta E_t} \right)^2 \quad (5)$$

Here,  $\tau$  (s) is the duration of the current pulse;  $n_m$  (mol) is the number of moles;  $V_m$  ( $\text{cm}^3 \text{mol}^{-1}$ ) is the molar volume of the electrode;  $S$  ( $\text{cm}^2$ ) is the electrode/electrolyte contact area;  $\Delta E_s$  is the steady state voltage change due to the current pulse, and  $\Delta E_t$  is the voltage change during the constant current pulse, eliminating the  $iR$  drop.

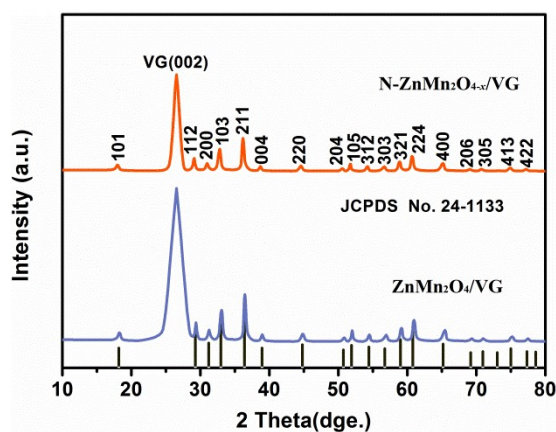

Figure S1. XRD patterns of  $\text{ZnMn}_2\text{O}_4/\text{VG}$  and  $\text{N-ZnMn}_2\text{O}_{4-x}/\text{VG}$ .

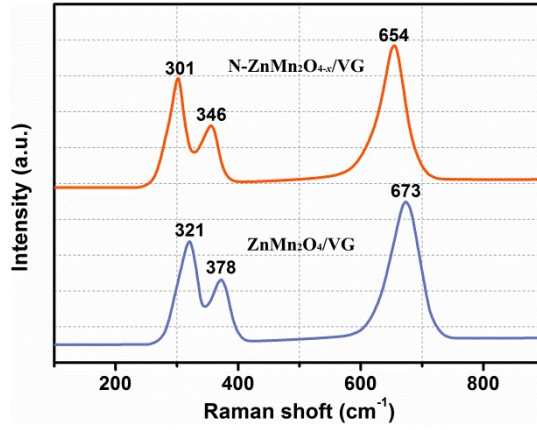

Figure S2. Raman spectra of ZnMn<sub>2</sub>O<sub>4</sub>/VG and N-ZnMn<sub>2</sub>O<sub>4-x</sub>/VG.

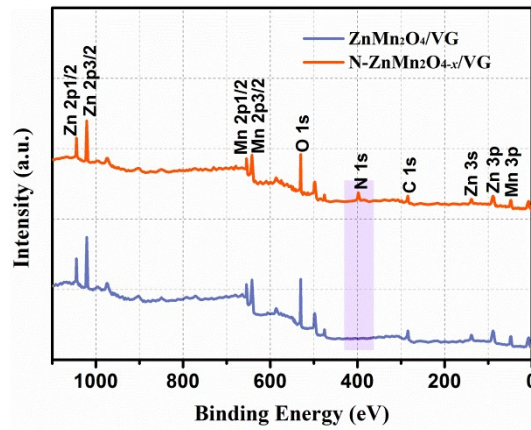

Figure S3. XPS survey spectra of ZnMn<sub>2</sub>O<sub>4</sub>/VG and N-ZnMn<sub>2</sub>O<sub>4-x</sub>/VG.

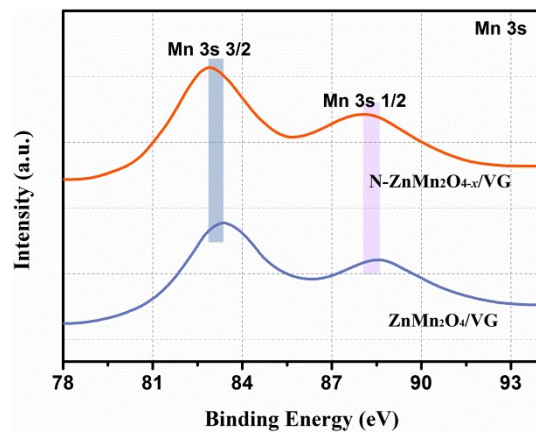

Figure S4. Core-level Mn 3s XPS spectra of ZnMn<sub>2</sub>O<sub>4</sub>/VG and N-ZnMn<sub>2</sub>O<sub>4-x</sub>/VG.

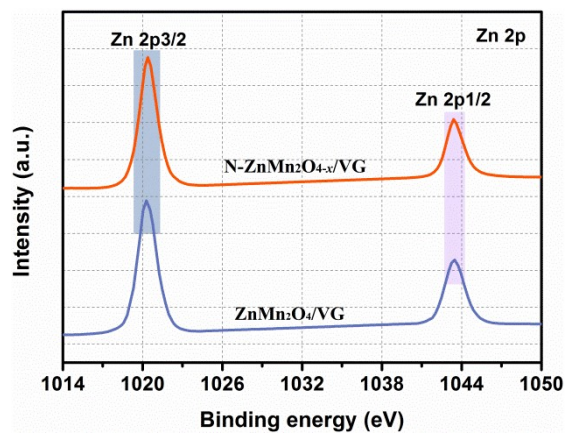

Figure S5. Core-level Zn 2p XPS spectra of ZnMn<sub>2</sub>O<sub>4</sub>/VG and N-ZnMn<sub>2</sub>O<sub>4-x</sub>/VG.

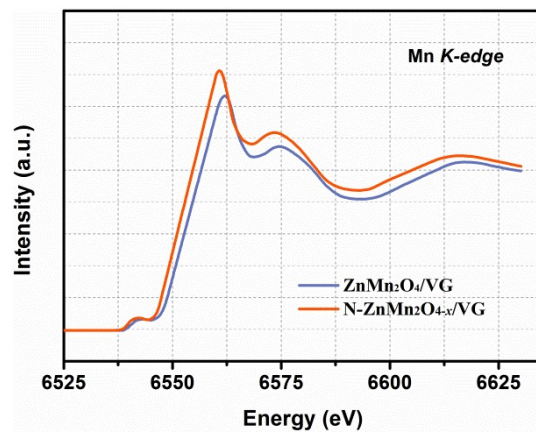

Figure S6. Mn K-edge XPS spectra of ZnMn<sub>2</sub>O<sub>4</sub>/VG and N-ZnMn<sub>2</sub>O<sub>4-x</sub>/VG.

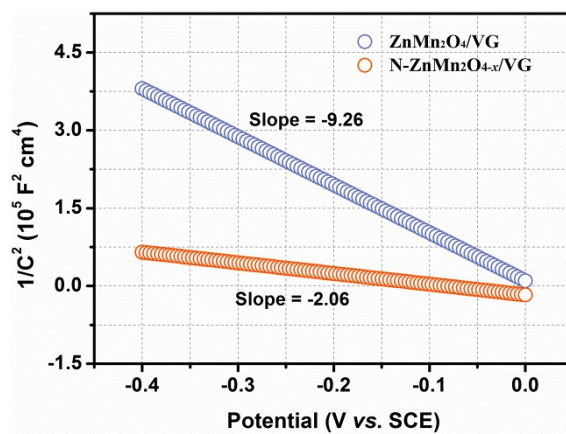

Figure S7. Mott-Schottky plots of ZnMn<sub>2</sub>O<sub>4</sub>/VG and N-ZnMn<sub>2</sub>O<sub>4-x</sub>/VG.

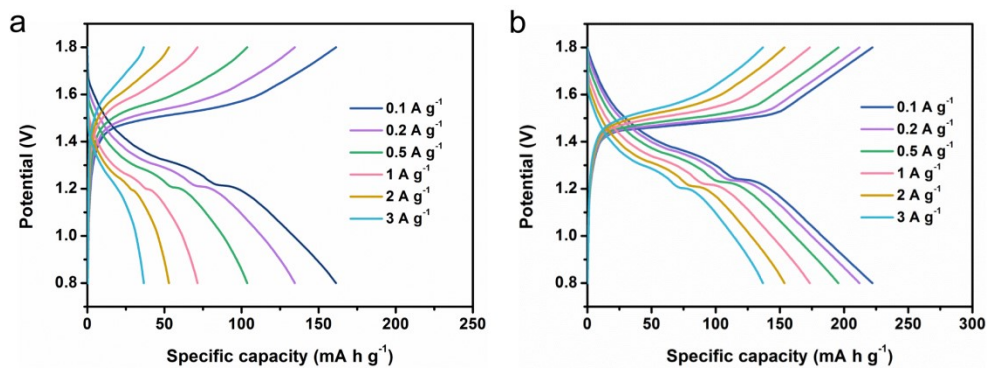

Figure S8. GCD curves of the (a)  $\text{ZnMn}_2\text{O}_4/\text{VG}$  and (b)  $\text{N-ZnMn}_2\text{O}_{4-x}/\text{VG}$  batteries.

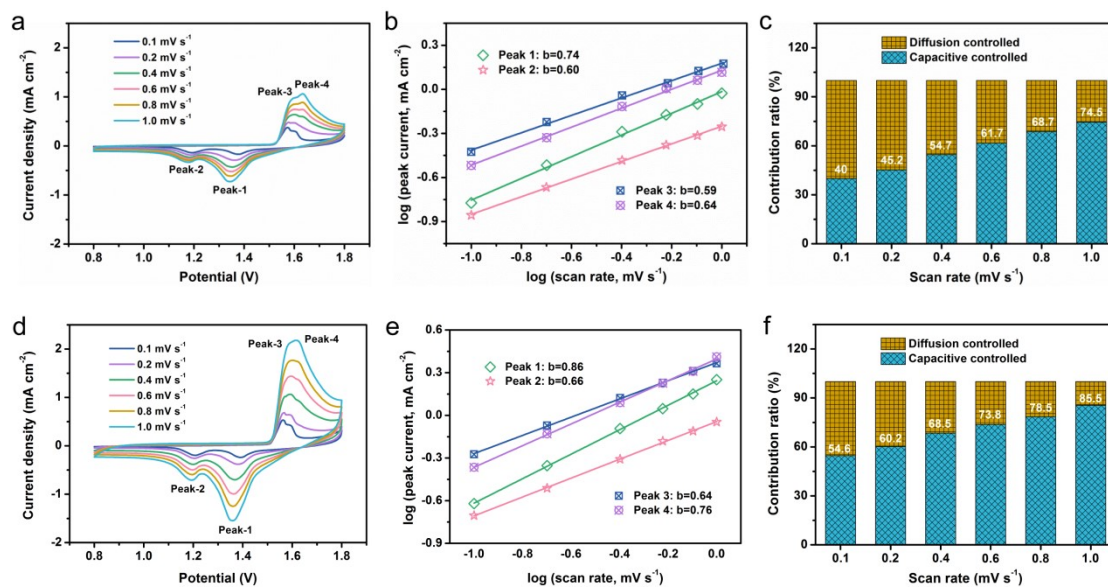

Figure S9. (a) CV curves, (b)  $\log(i)$  vs.  $\log(v)$  at each peak in (a), and (c) surface

capacitive contribution of the  $\text{ZnMn}_2\text{O}_4/\text{VG}$  electrode. (d) CV curves, (e)  $\log(i)$  vs.  $\log(v)$  at each peak in (e), and (f) surface capacitive contribution of the  $\text{N-ZnMn}_2\text{O}_{4-x}/\text{VG}$  electrode.

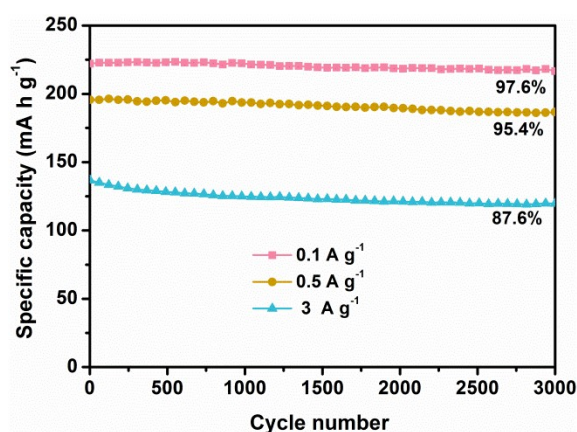

Figure S10. The cycling performance of  $\text{N-ZnMn}_2\text{O}_{4-x}/\text{VG}/\text{Zn}$  battery tested at 0.1, 0.5 and  $3.0 \text{ A g}^{-1}$ .

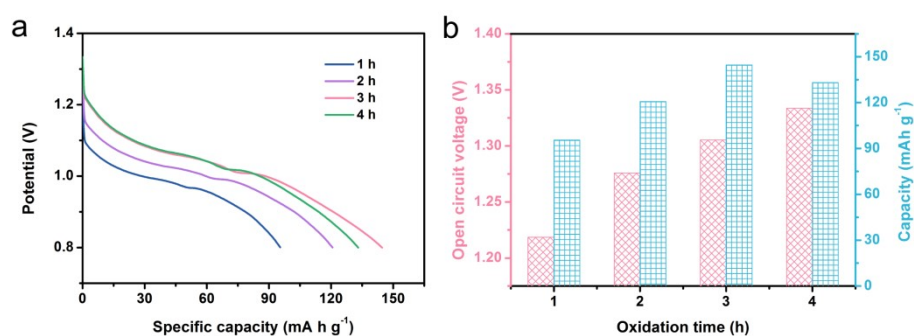

Figure S11. Electrochemical performance of  $\text{N-Zn}_{1-x}\text{Mn}_2\text{O}_{4-x}/\text{VG}/\text{Zn}$  batteries after the  $\text{N-ZnMn}_2\text{O}_{4-x}/\text{VG}$  electrodes are oxidized in deionized water for different times. (a) The galvanostatic discharge curves of  $\text{N-Zn}_{1-x}\text{Mn}_2\text{O}_{4-x}/\text{VG}/\text{Zn}$  batteries at  $0.1 \text{ A g}^{-1}$ . (b) Effect of the oxidation time on OCV and discharge capacity of  $\text{N-Zn}_{1-x}\text{Mn}_2\text{O}_{4-x}/\text{VG}/\text{Zn}$  batteries.



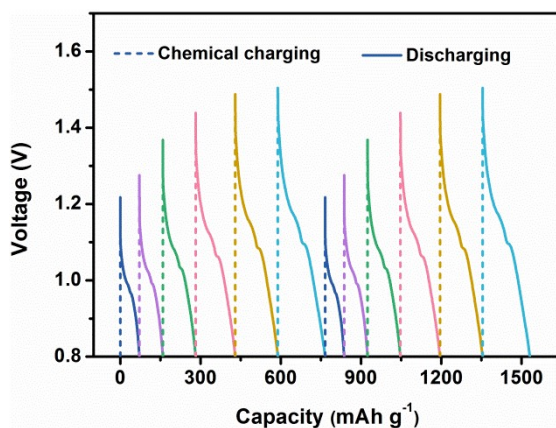

Figure S12. The chemical charging/galvanostatic discharging curves of N-Zn<sub>1-x</sub>Mn<sub>2</sub>O<sub>4-x</sub>/VG//Zn batteries at different chemically charge states (dotted lines: chemical charging for different times. Solid lines: galvanostatic discharging at 0.1 A g<sup>-1</sup>).

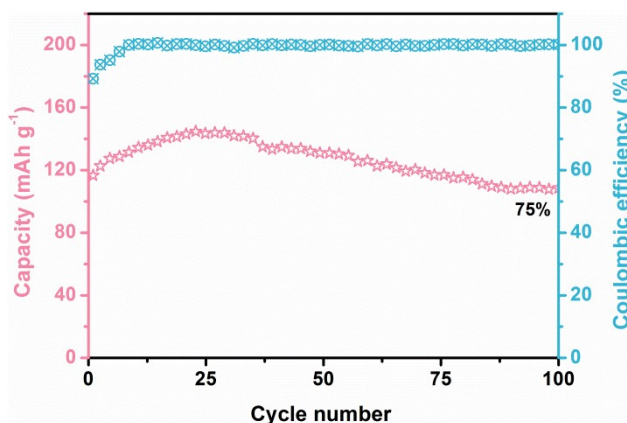

Figure S13. Cycle stability of N-Zn<sub>1-x</sub>Mn<sub>2</sub>O<sub>4-x</sub>/VG//Zn battery at 0.1 A g<sup>-1</sup> after the N-ZnMn<sub>2</sub>O<sub>4-x</sub>/VG electrode is oxidized in deionized water for 3 h.

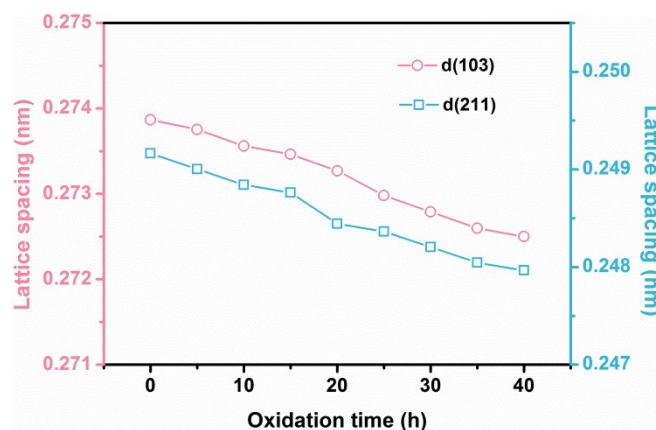

Figure S14. Calculational lattice spacing of (003) and (211) plane of N-ZnMn<sub>2</sub>O<sub>4-x</sub>/VG electrodes after being oxidized by O<sub>2</sub> for different times.

**Table S1.** Comparison of zinc storage performance of based cathodes.

| Cathodes                                          | Capacity (mA h g <sup>-1</sup> ) | Rate performance                    | Cycling stability (cycles) | Ref.      |
|---------------------------------------------------|----------------------------------|-------------------------------------|----------------------------|-----------|
| N-ZnMn <sub>2</sub> O <sub>4-x</sub> /VG          | 222 (0.1 A g <sup>-1</sup> )     | 61.2% (0.1 to 3 A g <sup>-1</sup> ) | 97.6% (3000)               | This work |
| ZnMn <sub>2</sub> O <sub>4</sub> NDs/rGO          | 185 (0.1 A g <sup>-1</sup> )     | 60.5% (0.1 to 5 A g <sup>-1</sup> ) | 72.4% (400)                | [1]       |
| ZnO-MnO@C                                         | 219 (0.1 A g <sup>-1</sup> )     | 60.3% (0.1 to 3 A g <sup>-1</sup> ) | 84% (2000)                 | [2]       |
| Hollow porous ZnMn <sub>2</sub> O <sub>4</sub>    | 112 (0.1 A g <sup>-1</sup> )     | 57% (0.1 to 3.2 A g <sup>-1</sup> ) | No negligible              | [3]       |
| ZMO@Ti <sub>3</sub> C <sub>2</sub> T <sub>x</sub> | 172.6 (0.1 A g <sup>-1</sup> )   | 48.9% (0.1 to 4 A g <sup>-1</sup> ) | 92.4% (5000)               | [4]       |

|                                                                  |                                 |                                          |               |      |
|------------------------------------------------------------------|---------------------------------|------------------------------------------|---------------|------|
| ZMO/C                                                            | 150 (0.05 A g <sup>-1</sup> )   | 48% (0.05 to 2 A g <sup>-1</sup> )       | 94% (500)     | [5]  |
| ZMO@PCPs                                                         | 177 (0.1 A g <sup>-1</sup> )    | 48% (0.1 to 4.0 A g <sup>-1</sup> )      | 90.3% (2000)  | [6]  |
| ZMO microrods                                                    | 180 (0.1 A g <sup>-1</sup> )    | 47.8% (0.1 to 2.4 A g <sup>-1</sup> )    | 79% (3000)    | [7]  |
| ZMO                                                              | 230 (0.5 A g <sup>-1</sup> )    | 43.9% (0.5 to 8 A g <sup>-1</sup> )      | 75% (2000)    | [8]  |
| rGO@HM-ZMO                                                       | 116.7 (0.1 A g <sup>-1</sup> )  | 39.1% (0.1 to 2 A g <sup>-1</sup> )      | No negligible | [9]  |
| ZnMn <sub>2</sub> O <sub>4</sub>                                 | 190.4 (0.2 A g <sup>-1</sup> )  | 32.6% (0.2 to 6.4 A g <sup>-1</sup> )    | 94.4% (500)   | [10] |
| ZnMn <sub>2</sub> O <sub>4</sub> @N-rGO                          | 204.4 (0.01 A g <sup>-1</sup> ) | 32.2% (0.01 to 1.5 A g <sup>-1</sup> )   | 84.7% (600)   | [11] |
| OD-ZMO@PEDOT                                                     | 221 (0.083 A g <sup>-1</sup> )  | 28.3% (0.083 to 1.66 A g <sup>-1</sup> ) | 93.8% (300)   | [12] |
| ZnMn <sub>2</sub> O <sub>4</sub> /Mn <sub>2</sub> O <sub>3</sub> | 130 (0.1 A g <sup>-1</sup> )    | 22.3% (0.1 to 6.4 A g <sup>-1</sup> )    | No negligible | [13] |

## References

- 1 Z. Yao, D. Cai, Z. Cui, Q. Wang and H. Zhan, *Ceram. Int.*, 2020, **46**, 11237.
- 2 S. Islam, M.H. Alfaruqi, D.Y. Putro, S. Park, S. Kim, S. Lee, M.S. Ahmed, V. Mathew, Y.K. Sun and J.Y. Hwang, *Adv. Sci.*, 2021, **8**, 2002636.
- 3 X. Wu, Y. Xiang, Q. Peng, X. Wu, Y. Li, F. Tang, R. Song, Z. Liu, Z. He and X. Wu, *J. Mater. Chem. A*, 2017, **5**, 17990.
- 4 M. Shi, B. Wang, Y. Shen, J. Jiang, W. Zhu, Y. Su, M. Narayanasamy, S.

- Angaiah, C. Yan and Q. Peng, *Chem. Eng. J.*, 2020, 399, 125627.
- 5 N. Zhang, F. Cheng, Y. Liu, Q. Zhao, K. Lei, C. Chen, X. Liu and J. Chen, *J. Am. Chem. Soc.*, 2016, **138**, 12894.
- 6 C. Yang, M. Han, H. Yan, F. Li, M. Shi and L. Zhao, *J. Power Sources*, 2020, **452**, 227826.
- 7 V. Soundharrajan, B. Sambandam, S. Kim, S. Islam, J. Jo, S. Kim, V. Mathew, Y.-k. Sun, J. Kim, *Energy Storage Mater.*, 2020, **28**, 407.
- 8 T.H. Wu, and W.Y. Liang, *ACS Appl. Mater. Interfaces*, 2021, **13**, 23822.
- 9 L. Chen, Z. Yang, H. Qin, X. Zeng, J. Meng and H. Chen, *Electrochim. Acta*, 2019, **317**, 155.
- 10 L. Yan, X. Zeng, Z. Li, X. Meng, D. Wei, T. Liu, M. Ling, Z. Lin and C. Liang, *Mater. Today Energy*, 2019, **13**, 323.
- 11 Y. Tao, Z. Li, L. Tang, X. Pu, T. Cao, D. Cheng, Q. Xu, H. Liu, Y. Wang and Y. Xia, *Electrochim. Acta*, 2020, **331**, 135296.
- 12 H. Zhang, J. Wang, Q. Liu, W. He, Z. Lai, X. Zhang, M. Yu, Y. Tong and X. Lu, *Energy Storage Mater.*, 2019, **21**, 154.
- 13 S. Yang, M. Zhang, X. Wu, X. Wu, F. Zeng, Y. Li, S. Duan, D. Fan, Y. Yang, X. Wu, *Electroanaly. Chem.*, 2019, **832**, 69.
